# Supplementary material for: Genetic risk factors modulate the association between physical activity and colorectal cancer
Source: Research Square preprint supplement (doi:10.21203/rs.3.rs-7350654/v1), 2025-09-02
Supplement: Supplementary file 1 [file d93017c33b6010311167d594.xlsx]

## Sheet: Supplementary Table 1
	Supplementary Table 1: Description and count of participants per study included in the analysis.
								Active vs. Inactive Participants				Physical Activity as Continuous Variableǂ
								Cases		Controls		Cases		Controls
	Study Acronym	Study Name	Study Design	Country	Genotyping Platform	Physical Activity Assessment	Reference Time	Active	Inactive	Active	Inactive	N	Mean (SD)	N	Mean (SD)
	Colo2&3	Hawai’i Colorectal Cancer Studies 2&3	case-series	USA	Illumina 300K	Self-reported questionnaire (subjective)	2 years prior to diagnosis	45 (51.7)	42 (48.3)	75 (62)	46 (38)	87	2.4 ± 0.5	121	2.5 ± 0.5
	CPSII_1	American Cancer Society Cancer Prevention Study II nested case-control study	cohort	USA	Affymetrix Axiom	Self-reported questionnaire (subjective)	1 year prior baseline	377 (73.6)	135 (26.4)	386 (75)	129 (25)	512	2.5 ± 1.1	515	2.5 ± 1.1
	CPSII_2	American Cancer Society Cancer Prevention Study II nested case-control study	cohort	USA	Illumina Oncoarray+ custom iSelect	Self-reported questionnaire (subjective)	1 year prior baseline	235 (73.2)	86 (26.8)	233 (71.9)	91 (28.1)	321	2.4 ± 1.1	324	2.5 ± 1.2
	DACHS_1	Darmkrebs: Chancen der Verhütung durch Screening	case-control	Germany	Illumina 300K	in-person interview questionnaire (subjective)	10 years prior baseline age	1568 (95.7)	71 (4.3)	1606 (95.9)	68 (4.1)	1639	2.6 ± 1.1	1674	2.6 ± 1.1
	DACHS_2	Darmkrebs: Chancen der Verhütung durch Screening	case-control	Germany	Illumina OmniExpress	in-person interview questionnaire (subjective)	10 years prior baseline age	622 (95.7)	28 (4.3)	477 (97.1)	14 (2.9)	650	2.2 ± 1	491	2.5 ± 1.1
	DACHS_3	Darmkrebs: Chancen der Verhütung durch Screening Study	case-control	Germany	Illumina OmniExpressExome	in-person interview questionnaire (subjective)	10 years prior baseline age	1128 (93.1)	83 (6.9)	597 (96.3)	23 (3.7)	1211	2.2 ± 1.1	620	2.4 ± 1.1
	DALS_1	Diet, Activity and Lifestyle Study	case-control	USA	Illumina 550K, 610K	in-person interview questionnaire (subjective)	1 year prior baseline, and 10 and 20 years.	369 (52.8)	330 (47.2)	434 (61.9)	267 (38.1)	399	2.4 ± 1.1	460	2.4 ± 1.1
	DALS_2	Diet, Activity and Lifestyle Study	case-control	USA	Illumina 300K	in-person interview questionnaire (subjective)	1 year prior baseline, and 10 and 20 years.	230 (57.6)	169 (42.4)	274 (59.6)	186 (40.4)	699	2.3 ± 1.1	701	2.5 ± 1.1
	EPIC	European Prospective Investigation into Cancer and Nutrition	cohort	Europe	Illumina OmniExpressExome	Selft-reported or in-person interview questionnaire (subjective)	1 year prior baseline	1654 (97.8)	38 (2.2)	1755 (97.7)	41 (2.3)	1692	2.5 ± 1.1	1796	2.5 ± 1.1
	HPFS_1	Health Professionals Follow-Up Study	cohort	USA	Illumina OmniExpress	Selft-reported questionnaire (subjective)	1 year prior baseline/follow-up	169 (75.8)	54 (24.2)	179 (79.2)	47 (20.8)	223	2.4 ± 1.1	226	2.5 ± 1.1
	HPFS_2	Health Professionals Follow-Up Study	cohort	USA	Illumina OmniExpress	Selft-reported questionnaire (subjective)	1 year prior baseline/follow-up	125 (72.3)	48 (27.7)	131 (77.1)	39 (22.9)	173	2.3 ± 1.1	170	2.4 ± 1.1
	HPFS_3_AD	Health Professionals Follow-Up Study	cohort	USA	Illumina OmniExpress	Selft-reported questionnaire (subjective)	1 year prior baseline/follow-up	234 (75.7)	75 (24.3)	225 (78.1)	63 (21.9)	309	2.4 ± 1.1	288	2.6 ± 1.1
	HPFS_4	Health Professionals Follow-Up Study	cohort	USA	Illumina OmniExpressExome	Selft-reported questionnaire (subjective)	1 year prior baseline/follow-up	131 (71.6)	52 (28.4)	161 (81.7)	36 (18.3)	183	2.4 ± 1.2	197	2.7 ± 1.1
	HPFS_5_AD	Health Professionals Follow-Up Study	cohort	USA	Illumina Oncoarray+ custom iSelect	Selft-reported questionnaire (subjective)	1 year prior baseline/follow-up	114 (73.5)	41 (26.5)	83 (79)	22 (21)	155	2.3 ± 1.1	105	2.6 ± 1.1
	LCCS	Leeds Colorectal Cancer Study	case-control	UK	Illumina Oncoarray+ custom iSelect	Selft-reported questionnaire (subjective)	Year before diagnosis (cases) or interview date (controls)	540 (38.7)	855 (61.3)	299 (43.9)	382 (56.1)	1397	2.4 ± 1.1	682	2.5 ± 1.1
	MEC_1	Multiethnic Cohort Study	cohort	USA	Illumina 300K	Selft-reported questionnaire (subjective)	1 year prior baseline	1220 (87.3)	177 (12.7)	623 (91.3)	59 (8.7)	321	2.8 ± 0.4	340	2.8 ± 0.4
	MEC_2*	Multiethnic Cohort Study	cohort	USA	Illumina 300K	Selft-reported questionnaire (subjective)	1 year prior baseline					63	2.1 ± 0.3	82	2.1 ± 0.3
	NCCCSI*	North Carolina Colon Cancer Study, I	case-control	USA	Illumina Oncoarray+ custom iSelect	in-person interview questionnaire (subjective)	Year before diagnosis (cases) or interview date (controls)					239	2.4 ± 1.2	458	2.6 ± 1.2
	NFCCR_2*	Newfoundland Case-Control Study 2	case-control	Canada	Affymetrix Axiom	Selft-reported questionnaire (subjective)	Participating regularly in physical activities n one’s 20s, 30s, 40, and 50s					191	2.4 ± 0.5	459	2.4 ± 0.5
	NHS_1	Nurses’ Health Study	cohort	USA	Illumina OmniExpress	Selft-reported questionnaire (subjective)	1 year prior baseline/follow-up	174 (53)	154 (47)	383 (59.4)	262 (40.6)	328	2.4 ± 1.1	645	2.5 ± 1.1
	NHS_2	Nurses’ Health Study	cohort	USA	Illumina OmniExpress	Selft-reported questionnaire (subjective)	1 year prior baseline/follow-up	73 (54.5)	61 (45.5)	82 (53.9)	70 (46.1)	134	2.3 ± 1.2	152	2.4 ± 1.2
	NHS_3_AD	Nurses’ Health Study	cohort	USA	Illumina OmniExpress	Selft-reported questionnaire (subjective)	1 year prior baseline/follow-up	300 (61.3)	189 (38.7)	245 (60.2)	162 (39.8)	489	2.6 ± 1.1	407	2.6 ± 1.1
	NHS_4	Nurses’ Health Study	cohort	USA	Illumina OmniExpressExome	Selft-reported questionnaire (subjective)	1 year prior baseline/follow-up	136 (50.4)	134 (49.6)	135 (51.7)	126 (48.3)	270	2.3 ± 1.1	261	2.4 ± 1.2
	NHS_5_AD	Nurses’ Health Study	cohort	USA	Illumina Oncoarray+ custom iSelect	Selft-reported questionnaire (subjective)	1 year prior baseline/follow-up	145 (58.9)	101 (41.1)	134 (63.5)	77 (36.5)	246	2.5 ± 1.1	211	2.6 ± 1.1
	NHSII	Nurses’ Health Study II	cohort	USA	Illumina Oncoarray	Selft-reported questionnaire (subjective)	1 year prior baseline/follow-up	64 (63.4)	37 (36.6)	62 (64.6)	34 (35.4)	101	2.6 ± 1.2	96	2.6 ± 1.1
	SMC_COSM*	Swedish Mammography Cohort and Cohort of Swedish Men	cohort	Sweden	Illumina Oncoarray	Selft-reported questionnaire (subjective)	1 year prior baseline					417	2.4 ± 1.1	701	2.5 ± 1.1
	UKB	UK Biobank	cohort	UK	UK Biobank Axiom	Selft-reported questionnaire (subjective)	Typical week	1970 (73.1)	724 (26.9)	8149 (75)	2712 (25)	2694	2.4 ± 1.1	10861	2.5 ± 1.1
	VITAL	VITamins And Lifestyle	cohort	USA	Illumina 300K	Selft-reported questionnaire (subjective)	10 years prior baseline	101 (38.3)	163 (61.7)	119 (42.7)	160 (57.3)	264	2.3 ± 1.1	279	2.4 ± 1.1
	WHI_1	Women’s Health Initiative Study	cohort	USA	Illumina 550K, 550Kduo, 610K	Selft-reported questionnaire (subjective)	No reference time	223 (49.9)	224 (50.1)	286 (55.8)	227 (44.2)	447	2.4 ± 1.1	513	2.6 ± 1.1
	WHI_2	Women’s Health Initiative Study	cohort	USA	Illumina 300K	Selft-reported questionnaire (subjective)	No reference time	431 (46.9)	487 (53.1)	485 (52)	448 (48)	918	2.4 ± 1.1	933	2.5 ± 1.1
	WHI_3	Women’s Health Initiative Study	cohort	USA	Illumina Oncoarray+ custom iSelect	Selft-reported questionnaire (subjective)	No reference time	258 (49.5)	263 (50.5)	286 (52.9)	255 (47.1)	521	2.4 ± 1.1	541	2.5 ± 1.1
	Total							12636 (66.1)	4821 (33.9)	17904 (69.6)	6046 (30.4)	17293	2.4 ± 1.0	25309	2.5 ± 1.0
	*Studies excluded for the primary physical activity variable (active vs. inactive) with 8.75 MET-h/wk cutoff value, since these studies had only one category (active or inactive) for the dichotomous variable.
	ǂSecondary physical activity variable assessed as study- and sex-specific quartiles and treated as continous variable.
